# Supplementary material for: COVID-19 admission risk tools should include multiethnic age structures, multimorbidity and deprivation metrics for air pollution, household overcrowding, housing quality and adult skills
Source: HighWire-hosted journal article supplement (doi:10.1136/bmjresp-2021-000951), 2021-08-01
Supplement: bmjresp-2021-000951supp001_data_supplement.pdf [file bmjresp-2021-000951supp001_data_supplement.pdf]

## **Online supplement 1**

### **Patient management**

Patients were admitted and treated initially according to British Thoracic Society (BTS) guidelines for COVID19 community acquired pneumonia with antibiotics, fluids and controlled oxygen where appropriate. Trust infection prevention measures were followed. No experimental agents were administered to these patients outside of clinical trials. A limited number of patients were enrolled in the UK RECOVERY trial and a trial of inhaled IFN-beta1a in COVID19 disease. No patients received ward-based continuous positive airway pressure non-invasive ventilation. Ward based bi-level non-invasive ventilation was only used if patients with pre-existing causes for chronic type-two respiratory failure were admitted with acute respiratory acidosis, with no evidence of infiltrates on their chest x-ray. At the beginning of the pandemic, the trust introduced a rapid review Chest X-ray reporting service staffed by Consultant radiologists to ensure Chest X-rays were reported within 12 hours of being undertaken. All suspected COVID19 infected patients had a decision about escalation to critical care and discussion in relation to resuscitation status at their first review after admission (typically in less than 4 hours due to the introduction of resident consultants during the pandemic). Patients who were for critical care escalation were reviewed by the critical care assessment team if they had an altered GCS, persistently low systolic blood pressure ( $<90\text{mmHg}$ ), respiratory acidosis ( $\text{pH}<7.2$ ) or were unable to maintain their target saturations or had a respiratory rate  $>30$  breaths per minute despite receiving a fractional inspired oxygen ( $\text{FiO}_2$ ) of  $\geq 0.5$ . If deemed appropriate, patients were intubated and transferred to critical care subsequently. All patients were prescribed their regular medications for existing medical conditions whilst in hospital unless a medication was contraindicated for clinical reasons in which case it was paused temporarily until safe to resume. All patients received 40 mg subcutaneous enoxaparin as venous thromboembolic disease prophylaxis daily, unless it was contraindicated, as per our hospital policy.

**Online supplement 2**

| <b>Authors</b> | <b>Score name</b>        | <b>Country of derivation</b>                             | <b>Development population</b>              | <b>Pre-existing or COVID specific</b>     | <b>Model outcome</b>  | <b>Predictors</b>                                                                                                                                        | <b>Original modelling approach</b> | <b>How are predictors combined?</b> |
|----------------|--------------------------|----------------------------------------------------------|--------------------------------------------|-------------------------------------------|-----------------------|----------------------------------------------------------------------------------------------------------------------------------------------------------|------------------------------------|-------------------------------------|
| Lim et al.     | CURB65                   | UK, Netherlands, New Zealand                             | Patients with community acquired pneumonia | Pre-existing community acquired pneumonia | 30 day mortality      | New onset confusion, urea (>7mmol/L), respiratory rate (≥30 breaths/minute), blood pressure (<90mmHg systolic or ≤60mmHg diastolic) and age (≥65 years). | Logistic regression                | Points based score                  |
| Gupta et al.   | ISARIC4C mortality score | UK, France, Netherlands, Italy, Pakistan, Turkey, Canada | Patients admitted with COVID19             | COVID specific                            | In hospital mortality | Age, Gender, Number of comorbidities, Respiratory Rate, Oxygen Saturations on room air, GCS, Urea, CRP                                                   | Logistic regression                | Points based score                  |

Characteristics of studies describing CURB65 and ISARIC4C mortality models

**Online Supplement 3**

|                                  | Odds Ratio | 99% CI Lower bound | 99% CI Upper bound | p-value |
|----------------------------------|------------|--------------------|--------------------|---------|
| <b>Univariate</b>                |            |                    |                    |         |
| Age                              | 1.04       | 1.03               | 1.04               | <0.000  |
| Male sex                         | 1.40       | 1.19               | 1.40               | <0.000  |
| Obesity (BMI $\geq$ 30)          | 3.32       | 2.77               | 3.96               | <0.001  |
| Hypertension                     | 1.23       | 1.04               | 1.45               | 0.018   |
| Ischaemic Heart Disease          | 1.34       | 1.08               | 1.66               | <0.009  |
| Heart Failure                    | 1.38       | 1.03               | 1.84               | <0.032  |
| Peripheral Vascular Disease      | 1.81       | 1.10               | 2.95               | <0.022  |
| COPD                             | 1.34       | 1.03               | 1.73               | <0.034  |
| Type 2 Diabetes Mellitus         | 1.21       | 1.01               | 1.45               | <0.041  |
| Cirrhosis                        | 4.40       | 1.79               | 10.82              | <0.0009 |
| Chronic Kidney Disease           | 1.44       | 1.14               | 1.81               | <0.002  |
| Charlson Comorbidity (CCI) Score | 1.19       | 1.16               | 1.23               | <0.000  |
| Multilobar pneumonia             | 2.13       | 1.77               | 2.57               | <0.000  |
| Index of Multiple Deprivation    | 0.88       | 0.75               | 1.04               | 0.126   |
| Wider BHS deprivation            | 0.92       | 0.78               | 1.08               | 0.305   |
| Outdoor LE deprivation           | 0.85       | 0.72               | 0.99               | 0.042   |
| Indoor LE deprivation            | 0.92       | 0.78               | 1.08               | 0.288   |
| Adult Skills deprivation         | 0.91       | 0.77               | 1.07               | 0.268   |
|                                  |            |                    |                    |         |
| Ethnic minorities                | 0.69       | 0.57               | 0.84               | <0.000  |
| Pakistani                        | 1.34       | 1.01               | 1.77               | <0.041  |
| African                          | 2.42       | 1.04               | 5.61               | <0.040  |
| Caribbean                        | 0.94       | 0.60               | 1.47               | 0.787   |
| Indian                           | 0.92       | 0.56               | 1.50               | 0.726   |
| Bangladeshi                      | 0.92       | 0.18               | 4.65               | 0.917   |
| Chinese                          | 0.68       | 0.18               | 2.51               | 0.559   |
| Mixed                            | 1.72       | 0.68               | 4.34               | 0.255   |
| Any other ethnic group           | 0.53       | 0.30               | 0.93               | 0.028   |
| <b>Multivariate</b>              |            |                    |                    |         |
| Age                              | 1.05       | 1.04               | 1.06               | <0.000  |
| Male sex                         | 1.50       | 1.25               | 1.81               | <0.000  |
| Charlson Comorbidity (CCI) Score | 1.11       | 1.06               | 1.16               | <0.000  |
| Obesity (BMI $\geq$ 30)          | 3.60       | 2.95               | 4.38               | <0.000  |
| Ischaemic Heart Disease          | 0.78       | 0.60               | 0.99               | 0.047   |
| Cirrhosis                        | 9.72       | 3.47               | 27.17              | <0.000  |
| Multilobar pneumonia             | 1.89       | 1.56               | 2.28               | <0.000  |

*Univariate and multivariate analyses to predict mortality*

**Online Supplement 4**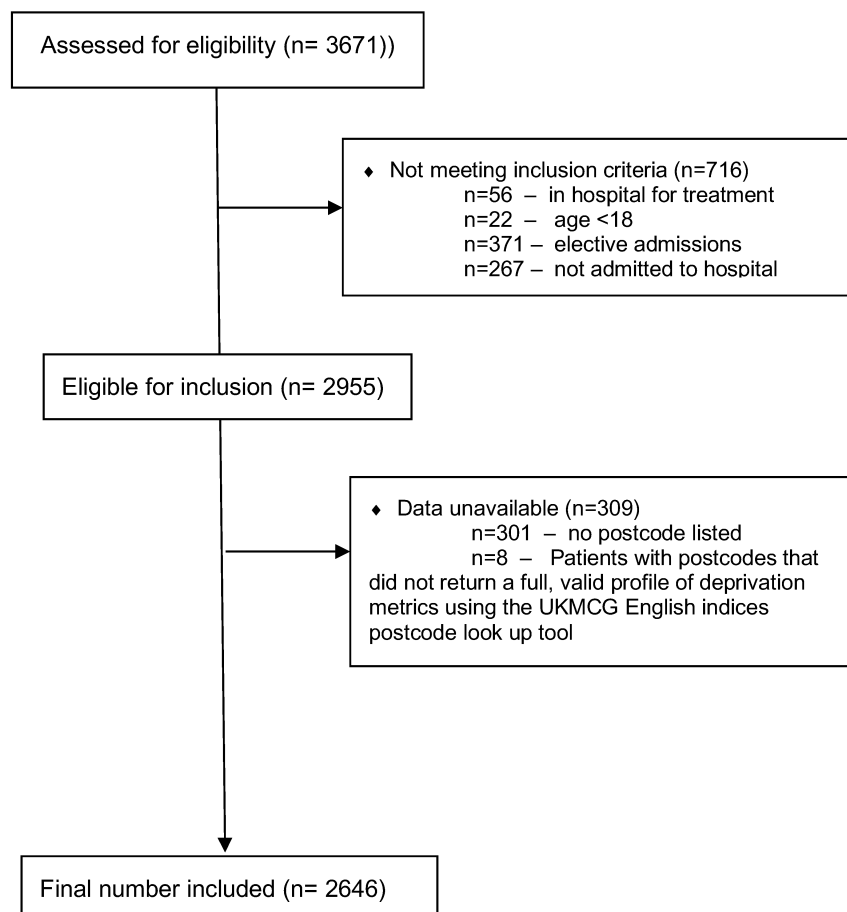

**A CONSORT diagram showing participants assessed for eligibility, the inclusion criteria and the final number of participants included.** 3671 consecutive patients were assessed for eligibility for inclusion into this study. 716 patients were excluded on account of having not met the inclusion criteria due to: ongoing hospitalisation on 1<sup>st</sup> September 2020 (n=55), age <18 (n=22), attending hospital as an elective admission (n=371) or attending hospital without admission (n=267). Patients eligible for inclusion in this study (n=2955) were reviewed; patients without listed postcodes (n=301) or postcodes not returning deprivation metrics (n=8) could not be included in the analysed group (n=2646).

Online Supplement 5

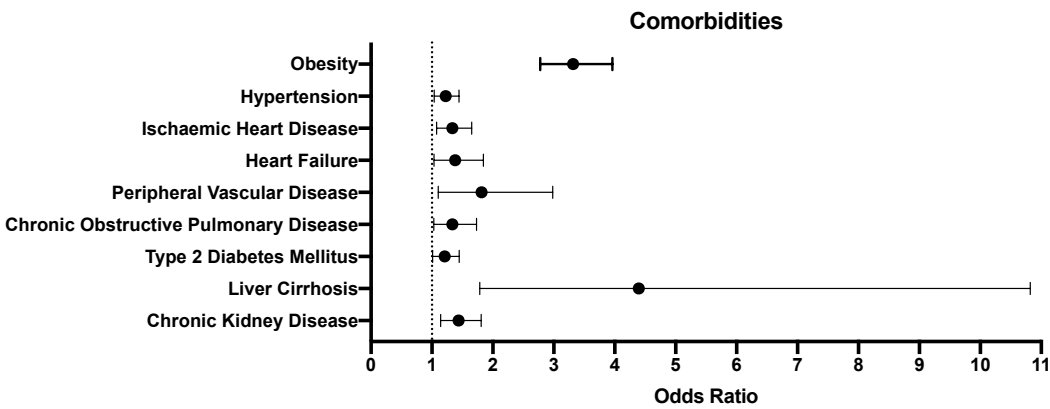

Odds ratios of mortality among COVID-19 patients by underlying obesity (BMI>30), hypertension, ischaemic heart disease, heart failure, peripheral vascular disease, COPD, type 2 diabetes mellitus, liver cirrhosis and chronic kidney disease

Online Supplement 6

|                                 | All COVID-19-positive patients | White       | Ethnic minorities | Pakistani  | Indian    | Caribbean | African   | Chinese   | Bangladeshi | Mixed     | Any other ethnic group |
|---------------------------------|--------------------------------|-------------|-------------------|------------|-----------|-----------|-----------|-----------|-------------|-----------|------------------------|
|                                 | 2646                           | 1917 (72.4) | 710 (26.8)        | 326 (12.3) | 93 (3.5)  | 105 (4.0) | 26 (<1)   | 16 (<1)   | 11 (<1)     | 22 (<1)   | 111 (4.2)              |
| Cardiovascular (n, % of column) |                                |             |                   |            |           |           |           |           |             |           |                        |
| HTN                             | 1030 (38.9)                    | 736 (38.4)  | 266 (37.4)        | 130 (39.9) | 43 (46.2) | 53 (50.5) | 9 (34.6)  | 5 (31.3)  | 2 (18.2)    | 6 (27.3)  | 40 (36.0)              |
| IHD                             | 433 (16.4)                     | 317 (16.5)  | 113 (15.9)        | 53 (16.3)  | 14 (15.1) | 15 (14.3) | 5 (19.2)  | 0 (0)     | 0 (0)       | 20 (90.9) | 6 (5.4)                |
| Hypercholesterolaemia           | 206 (7.8)                      | 145 (7.6)   | 56 (7.9)          | 33 (10.1)  | 4 (4.3)   | 6 (5.7)   | 3 (11.5)  | 2 (12.5)  | 1 (9.1)     | 6 (27.3)  | 1 (0.9)                |
| CCF                             | 208                            | 166 (8.7)   | 42 (5.9)          | 24 (7.4)   | 5 (5.4)   | 6 (5.7)   | 0 (0)     | 0 (0)     | 0 (0)       | 6 (27.3)  | 1 (0.9)                |
| Peripheral Vascular disease     | 64 (2.4)                       | 56 (2.9)    | 8 (1.1)           | 2 (0.6)    | 1 (1.1)   | 5 (4.8)   | 0 (0)     | 0 (0)     | 0 (0)       | 0 (0)     | 0 (0)                  |
| Stroke                          | 215 (8.1)                      | 170 (8.9)   | 44 (6.2)          | 12 (3.7)   | 3 (3.2)   | 15 (14.3) | 2 (7.7)   | 1 (6.3)   | 1 (9.1)     | 7 (31.8)  | 3 (2.7)                |
| Respiratory (n, % of column)    |                                |             |                   |            |           |           |           |           |             |           |                        |
| Asthma                          | 260 (9.8)                      | 194 (10.1)  | 66 (9.3)          | 31 (9.5)   | 8 (8.6)   | 9 (8.6)   | 2 (7.7)   | 1 (6.3)   | 1 (9.1)     | 10 (45.5) | 3 (2.7)                |
| COPD                            | 269 (10.2)                     | 202 (10.5)  | 67 (9.4)          | 28 (8.6)   | 9 (9.7)   | 8 (7.6)   | 3 (11.5)  | 2 (12.5)  | 0 (0)       | 12 (54.5) | 3 (2.7)                |
| ILD                             | 53 (2.0)                       | 42 (2.2)    | 11 (1.5)          | 4 (1.2)    | 1 (1.1)   | 2 (1.9)   | 1 (3.8)   | 1 (6.3)   | 0 (0)       | 2 (9.1)   | 0 (0)                  |
| OSA                             | 51 (1.2)                       | 38 (2.0)    | 13 (1.8)          | 5 (1.5)    | 2 (2.2)   | 2 (1.9)   | 0 (0)     | 1 (6.3)   | 0 (0)       | 3 (13.6)  | 0 (0)                  |
| Bronchiectasis                  | 32 (1.2)                       | 27 (1.4)    | 5 (0.7)           | 3 (0.9)    | 0 (0)     | 0 (0)     | 1 (3.8)   | 0 (0)     | 0 (0)       | 0 (0)     | 0 (0)                  |
| Renal (n, % of column)          |                                |             |                   |            |           |           |           |           |             |           |                        |
| CKD                             | 355 (13.4)                     | 262 (13.7)  | 93 (13.1)         | 39 (12.0)  | 14 (15.1) | 11 (10.5) | 3 (11.5)  | 1 (6.3)   | 2 (18.2)    | 15 (68.2) | 6 (5.4)                |
| Endocrinology (n, % of column)  |                                |             |                   |            |           |           |           |           |             |           |                        |
| T1DM                            | 26 (1.0)                       | 23 (1.2)    | 3 (0.4)           | 2 (0.6)    | 0 (0)     | 0 (0)     | 0 (0)     | 1 (6.3)   | 0 (0)       | 0 (0)     | 0 (0)                  |
| T2DM                            | 713 (26.9)                     | 517 (27.0)  | 196 (27.6)        | 81 (24.8)  | 29 (31.2) | 26 (24.8) | 5 (19.2)  | 2 (12.5)  | 2 (18.2)    | 6 (27.3)  | 8 (7.2)                |
| Vitamin D < 20                  | 56 (2.1)                       | 38 (2.0)    | 18 (2.5)          | 7 (2.1)    | 4 (4.3)   | 3 (2.9)   | 2 (7.7)   | 0 (0)     | 0 (0)       | 2 (9.1)   | 0 (0)                  |
| BMI>30                          | 742 (28.0)                     | 481 (25.1)  | 261 (36.8)        | 136 (41.7) | 22 (23.7) | 34 (32.4) | 10 (38.5) | 5 (31.3)  | 2 (18.2)    | 8 (36.4)  | 35 (31.5)              |
| Hepatobiliary (n, % of column)  |                                |             |                   |            |           |           |           |           |             |           |                        |
| Hepatitis                       | 14 (0.5)                       | 4 (0.2)     | 10 (1.4)          | 4 (1.2)    | 4 (4.3)   | 1 (1.0)   | 2 (2.7)   | 1 (6.3)   | 0 (0)       | 1 (4.5)   | 1 (0.9)                |
| Cirrhosis                       | 22 (0.8)                       | 21 (1.1)    | 1 (0.1)           | 0 (0)      | 0 (0)     | 0 (0)     | 0 (0)     | 0 (0)     | 0 (0)       | 0 (0)     | 1 (0.9)                |
| Peptic Ulcer Disease            | 35 (1.3)                       | 30 (1.6)    | 5 (0.7)           | 2 (0.6)    | 1 (1.1)   | 0 (0)     | 0 (0)     | 0 (0)     | 0 (0)       | 1 (4.5)   | 0 (0)                  |
| Variceal GI bleed               | 12 (0.5)                       | 10 (0.5)    | 2 (0.3)           | 0 (0)      | 0 (0)     | 1 (1.0)   | 0 (0)     | 0 (0)     | 0 (0)       | 1 (4.5)   | 0 (0)                  |
| Rheumatology (n, % of column)   |                                |             |                   |            |           |           |           |           |             |           |                        |
| Connective Tissue Disease       | 204 (7.7)                      | 166 (8.7)   | 38 (5.4)          | 15 (4.6)   | 5 (5.4)   | 8 (7.6)   | 3 (11.5)  | 3 (18.8)  | 0 (0)       | 4 (18.2)  | 0 (0)                  |
| Multimorbidity (n,% of column)  |                                |             |                   |            |           |           |           |           |             |           |                        |
| >1 comorbidity                  | 2042 (81.4)                    | 1555 (84.7) | 472 (66.5)        | 209 (69.4) | 66 (75.0) | 87 (85.3) | 19 (76.0) | 12 (80.0) | 5 (45.5)    | 14 (77.8) | 74 (66.7)              |
| 4 or more comorbidities         | 791 (31.6)                     | 641 (31.6)  | 147 (20.7)        | 68 (22.6)  | 16 (18.2) | 31 (30.4) | 6 (24.0)  | 1 (6.7)   | 0 (0)       | 3 (16.7)  | 25 (22.5)              |

A table representing underlying comorbidities and multimorbidity among hospitalised COVID-19 positive patients by ethnic subgroup: disaggregating ethnic minorities

Online Supplement 7

| Case control matching by                    |                                         | n   | Pakistani | Control | n  | African | Control | n   | Caribbean | Control | n  | Indian | Control | n  | Chinese | Control  | n | Bangladeshi | Control | n  | Mixed     | Control   | n   | Any other ethnic group | Control   |
|---------------------------------------------|-----------------------------------------|-----|-----------|---------|----|---------|---------|-----|-----------|---------|----|--------|---------|----|---------|----------|---|-------------|---------|----|-----------|-----------|-----|------------------------|-----------|
| A) Age, Gender                              | Charlson Comorbidity Score Median (IQR) | 295 | 5(5)      | 4(4)    | 26 | 4(6)    | 2.5(4)  | 103 | 6(5)      | 5(5)    | 89 | 5(4)   | 4(4)    | 15 | 4(4)    | 3(5)     | 8 | 2(5)        | 2(5)    | 21 | 5(5)      | 5(5)      | 106 | 3(4.25)                | 2(4.25)   |
|                                             | No. of Comorbidities Median (IQR)       | 295 | 4(3)      | 3(4)    | 26 | 4(3)    | 3(3)    | 103 | 4(3)      | 3(3.75) | 89 | 3(2)   | 3(3.75) | 15 | 2(1.75) | 2(2)     | 8 | 1(3)        | 2(3)    | 21 | 3(2.5)    | 3(3)      | 106 | 2(3)                   | 2(3)      |
| B) Age, Gender and Outdoor LE deprivation   | Charlson Comorbidity Score Median (IQR) | 265 | 5(4)      | 4(4)    | 25 | 5(3)    | 4(6)    | 101 | 6(5)      | 5(4)    | 82 | 5(3)   | 4(5)    | 15 | 4(4.5)  | 3.5(7)   | 9 | 4.5(7.25)   | 2(4)    | 20 | 5.5(5.25) | 4.5(4.75) | 93  | 4(4.25)                | 3(3)      |
| C) Age, Gender and Indoor LE deprivation    | Charlson Comorbidity Score Median (IQR) | 269 | 5(4)      | 4(4)    | 21 | 5(6)    | 4(4)    | 101 | 6(5)      | 5(4.5)  | 85 | 5(4)   | 4(4)    | 15 | 4(4.5)  | 3(3.5)   | 7 | 4(6.5)      | 3(4)    | 20 | 5.5(5.25) | 4.5(3.75) | 95  | 4(4)                   | 3(4)      |
| D) Age, Gender and Wider BHS deprivation    | Charlson Comorbidity Score Median (IQR) | 267 | 5(4)      | 4(4)    | 25 | 4(6)    | 2(4)    | 100 | 6(4.75)   | 5(4)    | 85 | 5(3.5) | 4(4.5)  | 15 | 4(4)    | 3(5)     | 9 | 5(7)        | 3(4)    | 20 | 5.5(5.25) | 4.5(4.75) | 95  | 4(4.5)                 | 3(4)      |
| E) Age, Gender and Adult Skills deprivation | Charlson Comorbidity Score Median (IQR) | 256 | 5(4)      | 4(4)    | 23 | 5(6)    | 3(4)    | 101 | 6(5)      | 5(5)    | 86 | 5(4)   | 4(4)    | 14 | 4(4.5)  | 3.5(3.5) | 9 | 4(6)        | 3.5(6)  | 10 | 4.5(3.5)  | 3.5(3.25) | 90  | 3(4)                   | 2.5(4.25) |

A table representing Charlson Comorbidity Index (CCI) Scores among patients of ethnic minorities in comparison with matched controls by: a) Age and Gender, b) Age, Gender and Outdoor LE deprivation, c) Age Gender and Indoor LE deprivation, d) Age, Gender and Adult Skills deprivation.

**Online Supplement 8**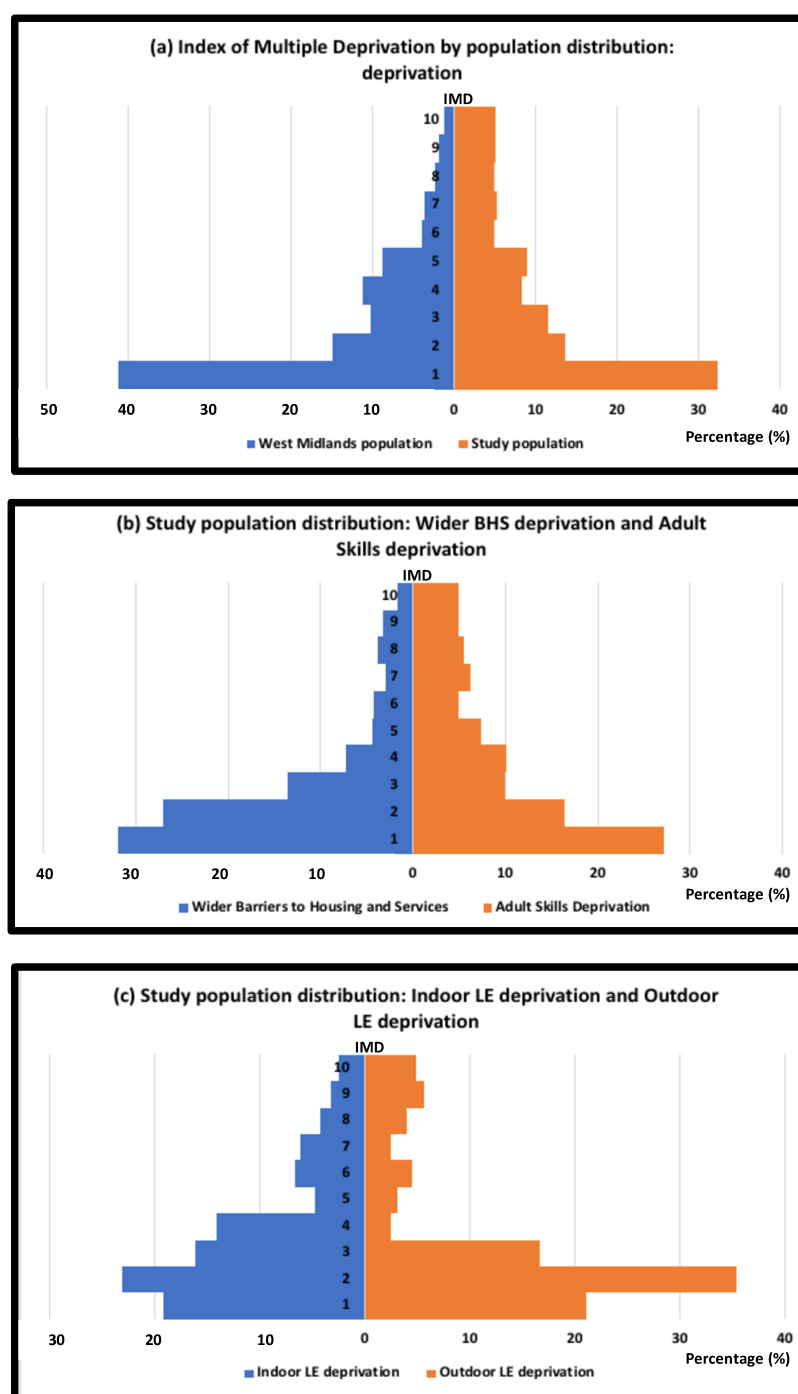

**Population pyramid distributions of hospitalised COVID-19 positive patients:** (a) Index of Multiple Deprivation (IMD) distribution in the West Midlands population in comparison with the study population, (b) Wider BHS and Adult skills deprivation distribution in the study population, (c) Indoor LE and Outdoor LE deprivation distribution in the study population.



**Online Supplement 9**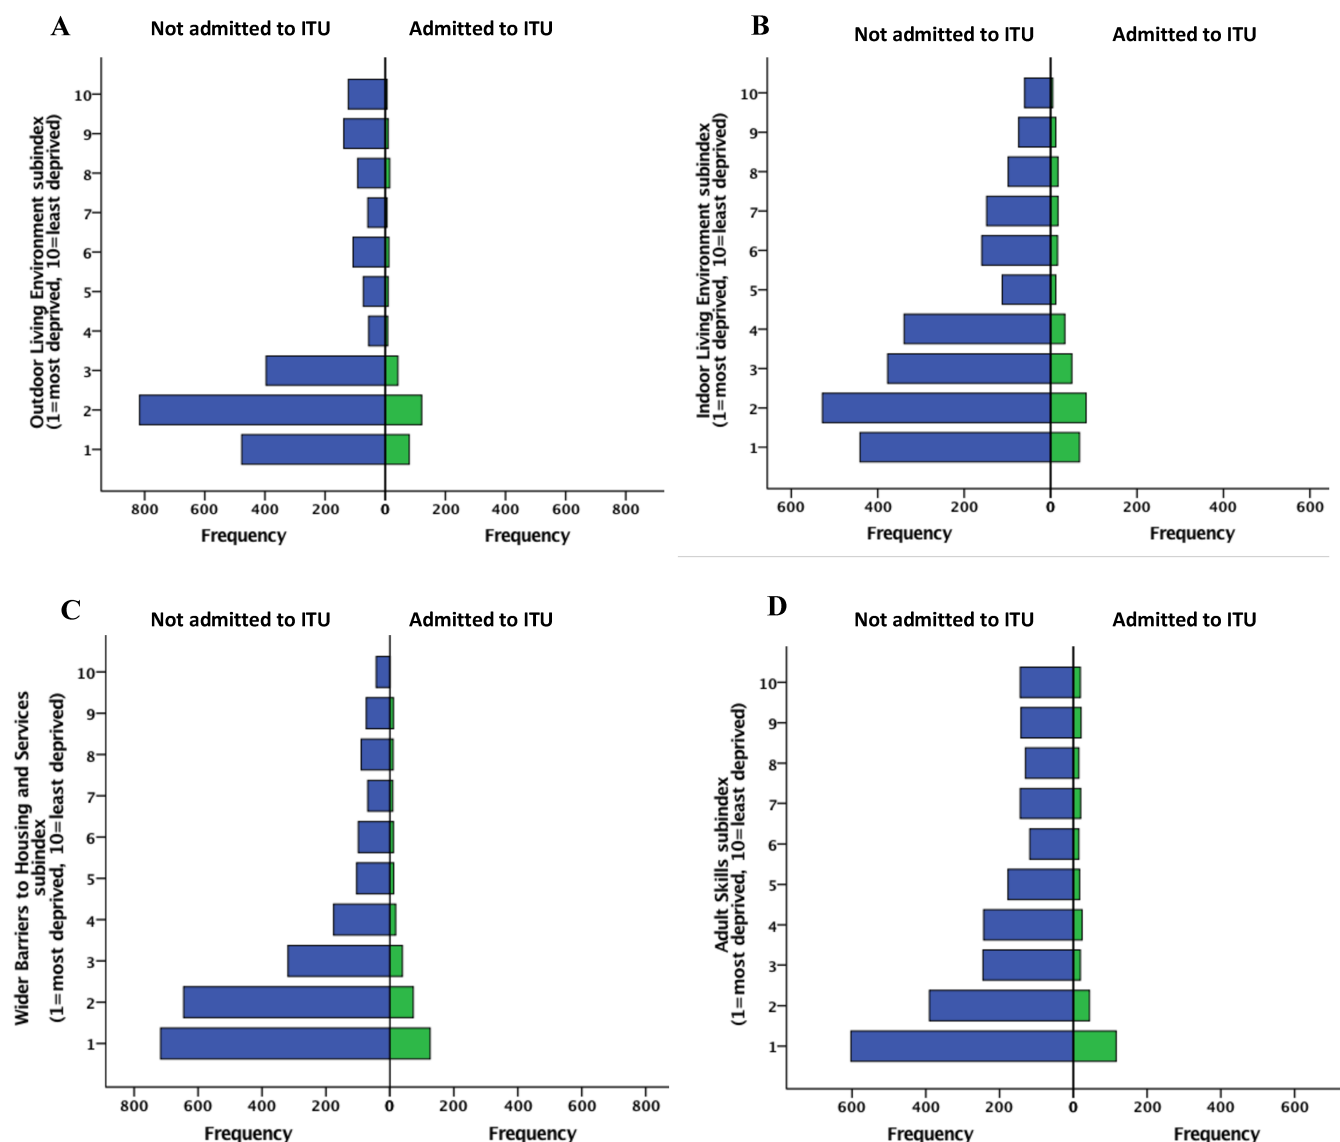

Population pyramid distributions of COVID-19 positive patients admitted to ITU by (a) Outdoor Living Environment deprivation, (b) Indoor Living Environment deprivation, (c) Wider Barriers to Housing and Services deprivation, (d) Adult Skills deprivation

**Online Supplement 10**

| Admission from the most deprived quintile | N           | BHS deprivation    | Wider BHS deprivation | LE deprivation     | Indoor LE deprivation | Outdoor LE deprivation | Adult Skills deprivation |
|-------------------------------------------|-------------|--------------------|-----------------------|--------------------|-----------------------|------------------------|--------------------------|
| Ethnic group, n (% of ethnic group)       |             |                    |                       |                    |                       |                        |                          |
| White                                     | 1917        | 566 (29.5)         | 963 (50.2)            | 815 (42.4)         | 719 (37.5)            | 900 (46.9)             | 673 (35.1)               |
| Ethnic minorities                         | 710         | 442 (62.3)         | 580 (81.7)            | 506 (71.3)         | 388 (54.6)            | 579 (81.5)             | 467 (65.8)               |
| Indian                                    | 93          | 34 (36.6)          | 54 (58.1)             | 48 (51.6)          | 35 (37.6)             | 65 (69.9)              | 34 (36.6)                |
| Pakistani                                 | 326         | 250 (76.7)         | 293 (89.9)            | 263 (80.7)         | 202 (62.0)            | 290 (89.0)             | 266 (81.6)               |
| Caribbean                                 | 105         | 59 (56.2)          | 88 (83.8)             | 76 (72.4)          | 55 (52.4)             | 89 (84.8)              | 53 (50.5)                |
| African                                   | 26          | 15 (57.7)          | 21 (80.8)             | 18 (69.2)          | 13 (50)               | 19 (73.1)              | 20 (76.9)                |
| Chinese                                   | 16          | 4 (25.0)           | 13 (81.3)             | 10 (62.5)          | 9 (56.3)              | 11 (68.8)              | 7 (43.8)                 |
| Bangladeshi                               | 11          | 8 (72.7)           | 9 (81.8)              | 8 (72.7)           | 6 (54.5)              | 9 (81.8)               | 7 (63.6)                 |
| Mixed                                     | 22          | 13 (59.1)          | 17 (77.3)             | 12 (54.5)          | 8 (36.4)              | 14 (63.6)              | 16 (72.7)                |
| Any other ethnic group                    | 111         | 59 (53.2)          | 85 (76.6)             | 71 (64.0)          | 60 (54.1)             | 82 (73.9)              | 64 (57.7)                |
| Unspecified                               | 19          | 13 (68.4)          | 18 (94.7)             | 14 (73.7)          | 11 (57.9)             | 16 (84.2)              | 13 (68.4)                |
| <b>Total</b>                              | <b>2646</b> | <b>1021 (38.6)</b> | <b>1561 (59.0)</b>    | <b>1335 (50.5)</b> | <b>1118 (42.3)</b>    | <b>1495 (56.5)</b>     | <b>1153 (43.6)</b>       |

*Admissions by most deprived quintile: BHS, Wider BHS, LE, Indoor LE, Outdoor LE and Adult Skills*

**Online supplement 11**

Univariate analyses revealed that ethnic minority COVID19 positive patients were more likely to be admitted the most deprived quintile: wider BHS [OR 4.42 (3.59-5.46);  $p<0.001$ ], housing quality (indoor LE) [OR 2.01(1.69-2.39);  $p<0.001$ ], air pollution (Outdoor LE) [OR 4.99(4.05-6.16);  $p<0.001$ ], Adult Skills [OR 3.55(2.96-4.26);  $p<0.001$ ], present with multi-lobar pneumonia [OR 2.47(2.06-2.95);  $p<0.001$ ] and be admitted to ITU [OR 2.82(2.22-3.61);  $p<0.001$ ] in comparison with White patients.

**Online supplement 12**

|                               | ISARIC4C AUROC (95% CI) | CURB65 AUROC (95% CI) |
|-------------------------------|-------------------------|-----------------------|
| <b>All patients</b>           | 0.60 (0.56-0.64)        | 0.62 (0.59-0.66)      |
| <b>Caucasian</b>              | 0.58 (0.54-0.63)        | 0.67 (0.63-0.71)      |
| <b>Ethnic minorities</b>      | 0.64 (0.58-0.70)        | 0.53 (0.46-0.59)      |
| <b>Indian</b>                 | 0.83 (0.73-0.93)        | 0.53 (0.39-0.67)      |
| <b>Pakistani</b>              | 0.58 (0.47-0.69)        | 0.55 (0.44-0.66)      |
| <b>Caribbean</b>              | 0.63 (0.49-0.78)        | 0.52 (0.36-0.68)      |
| <b>African</b>                | 0.65 (0.34-0.96)        | 0.45 (0.12-0.78)      |
| <b>Any other ethnic group</b> | 0.61 (0.20-1.00)        | 0.61 (0.30-0.92)      |
| <b>Chinese</b>                | 0.59 (0.30-0.89)        | 0.32 (0.01-0.63)      |
| <b>Mixed</b>                  | 0.63 (0.47-0.80)        | 0.53 (0.36-0.69)      |

Performance metrics for CURB65 and ISARIC4C prognostic scores by ethnic subgroup
